# Supplementary material for: High Expression of Ten Eleven Translocation 1 Is Associated with Poor Prognosis in Hepatocellular Carcinoma
Source: Hindawi journal article supplement (doi:10.1155/2023/2664370), 2023-05-04

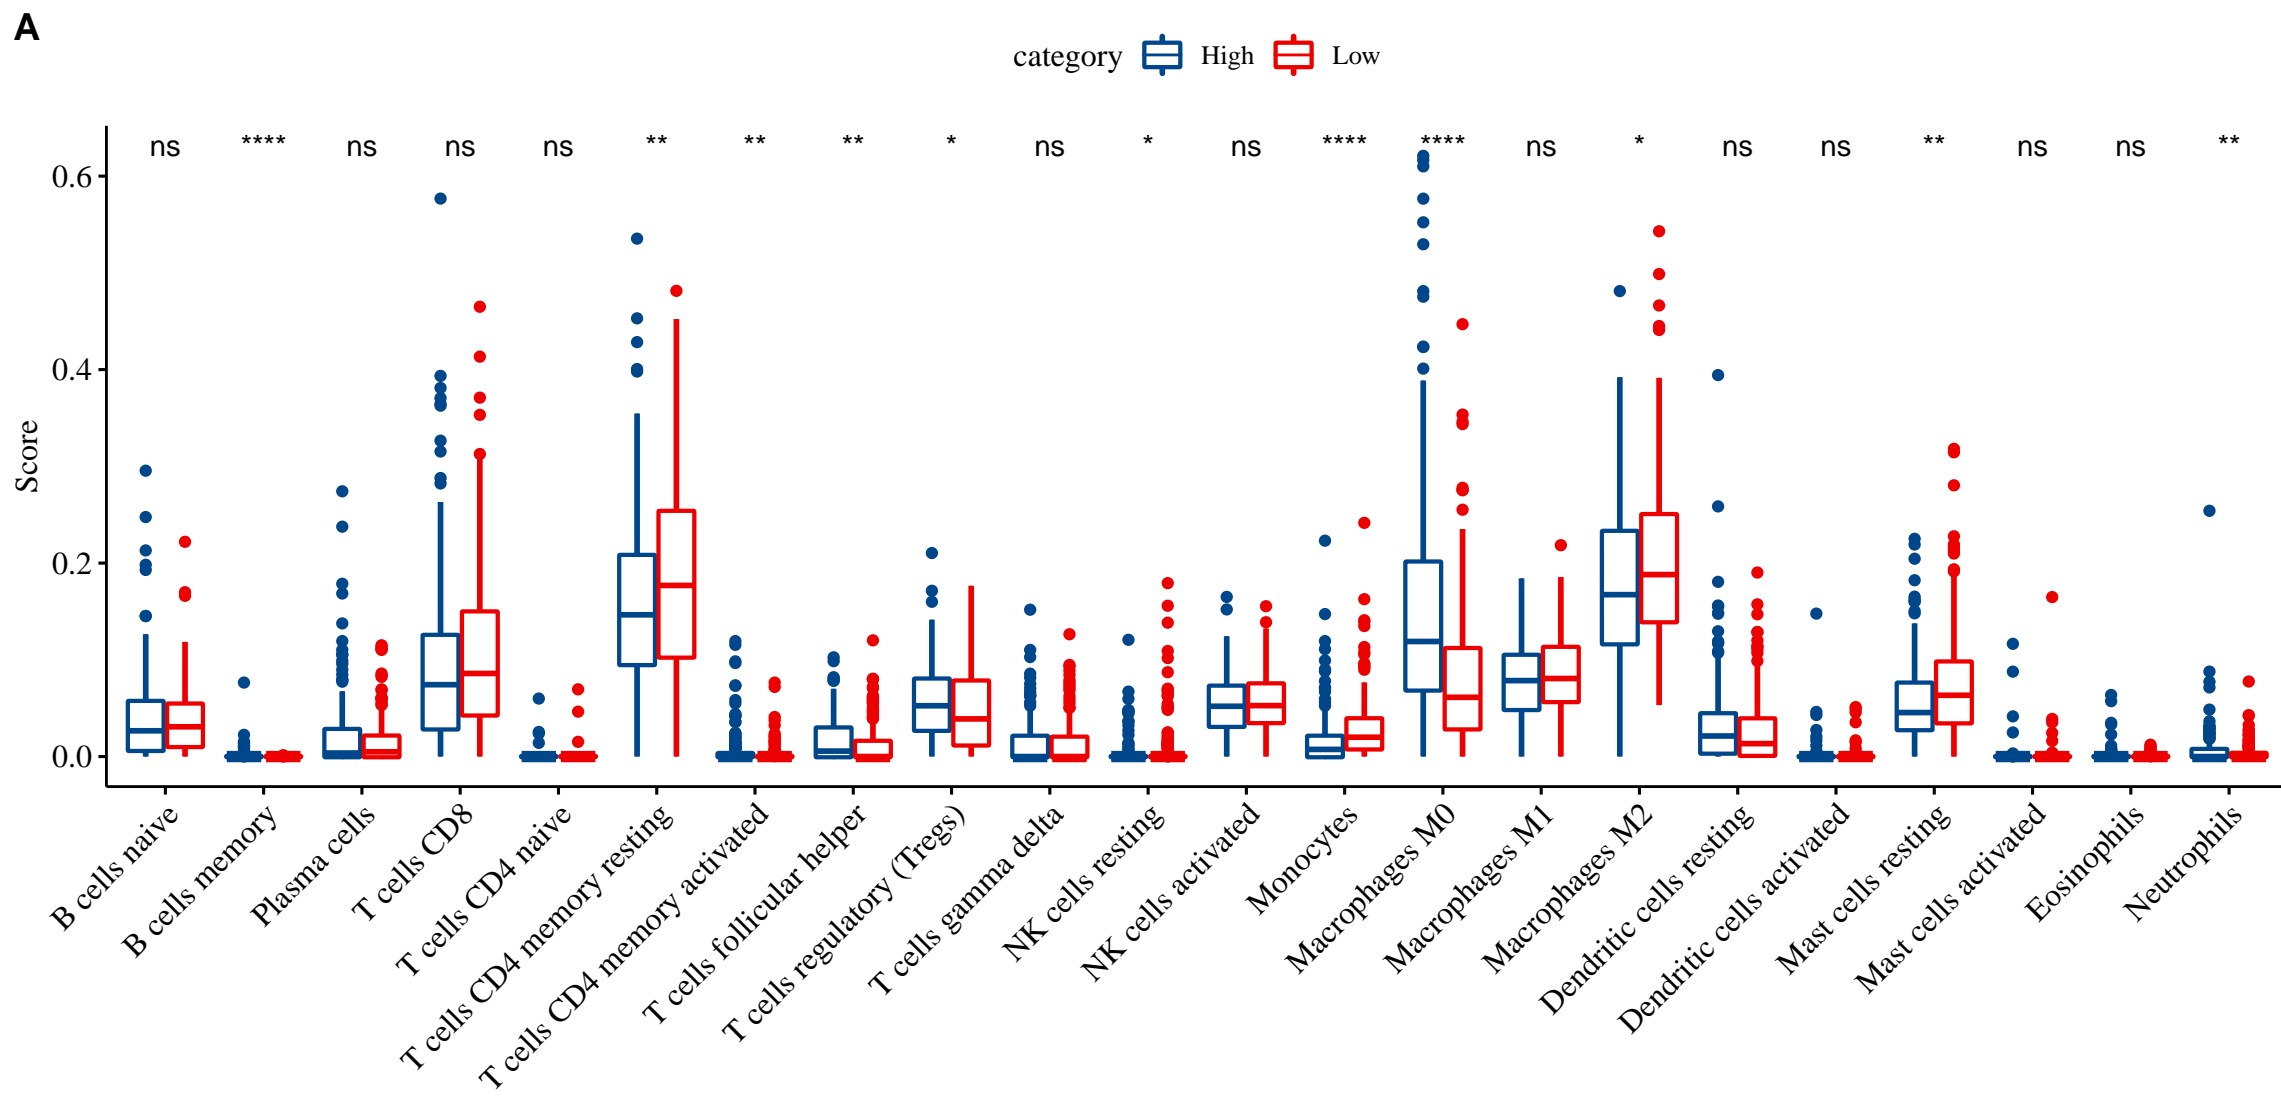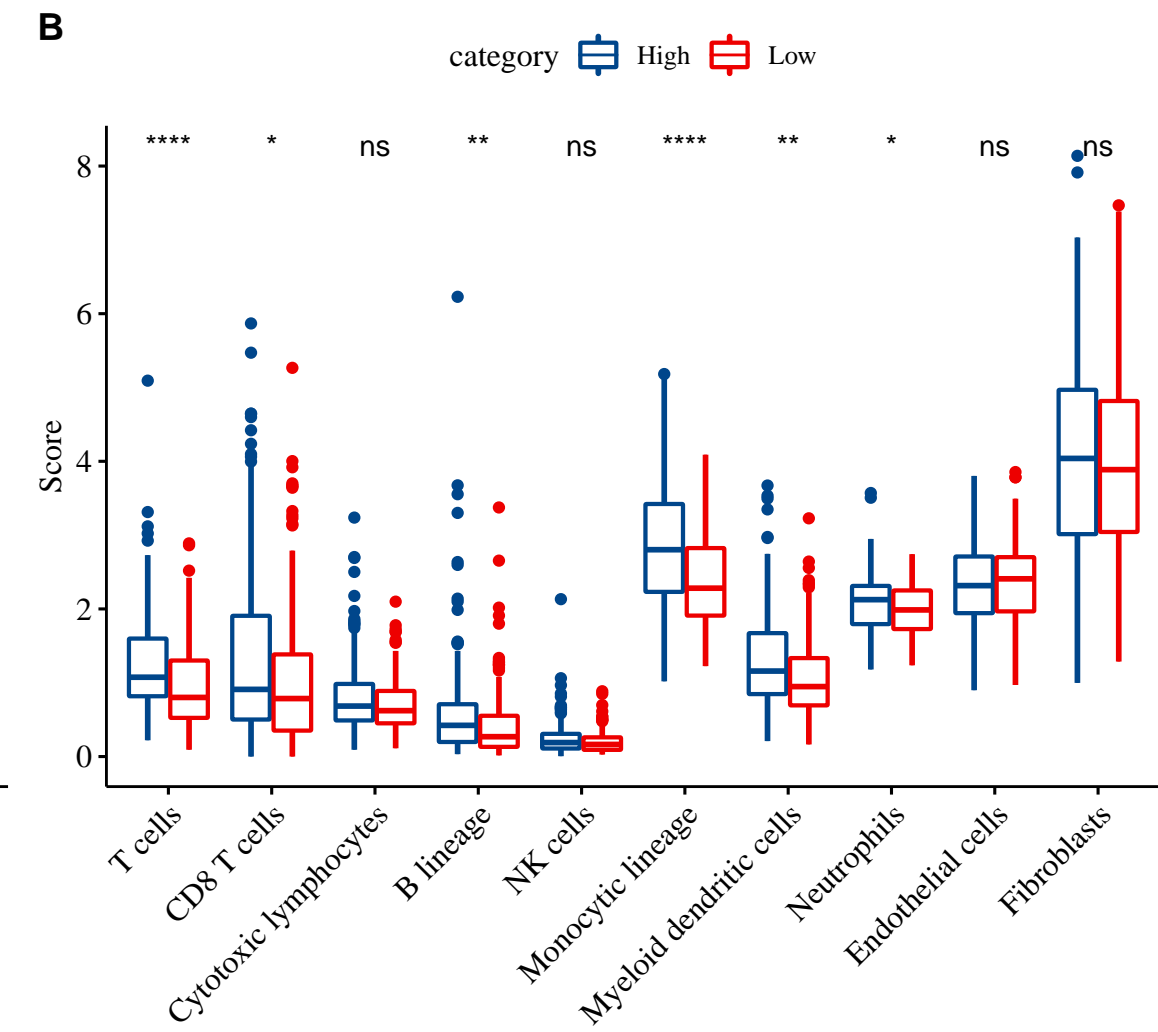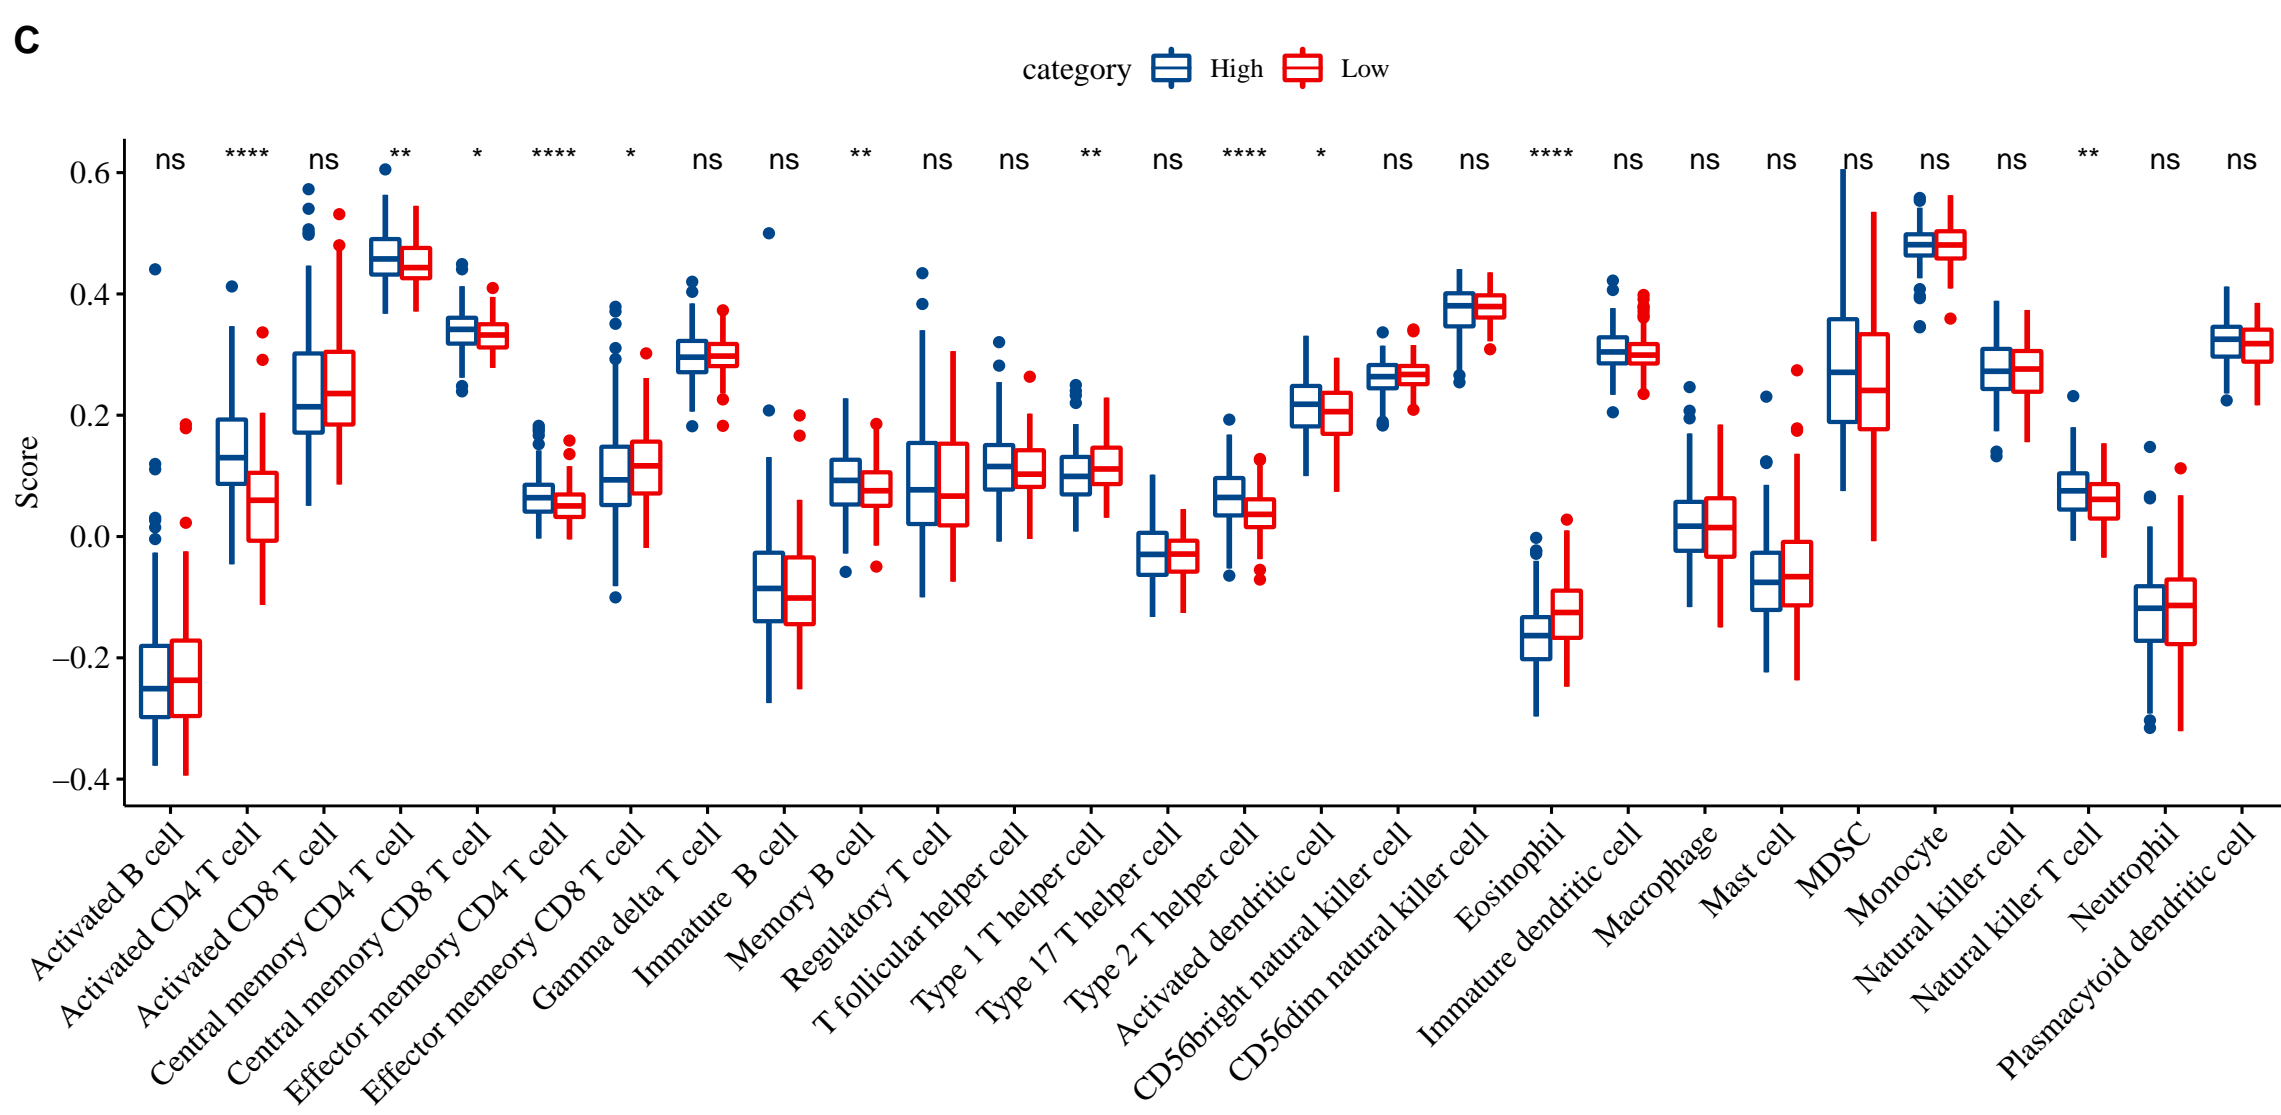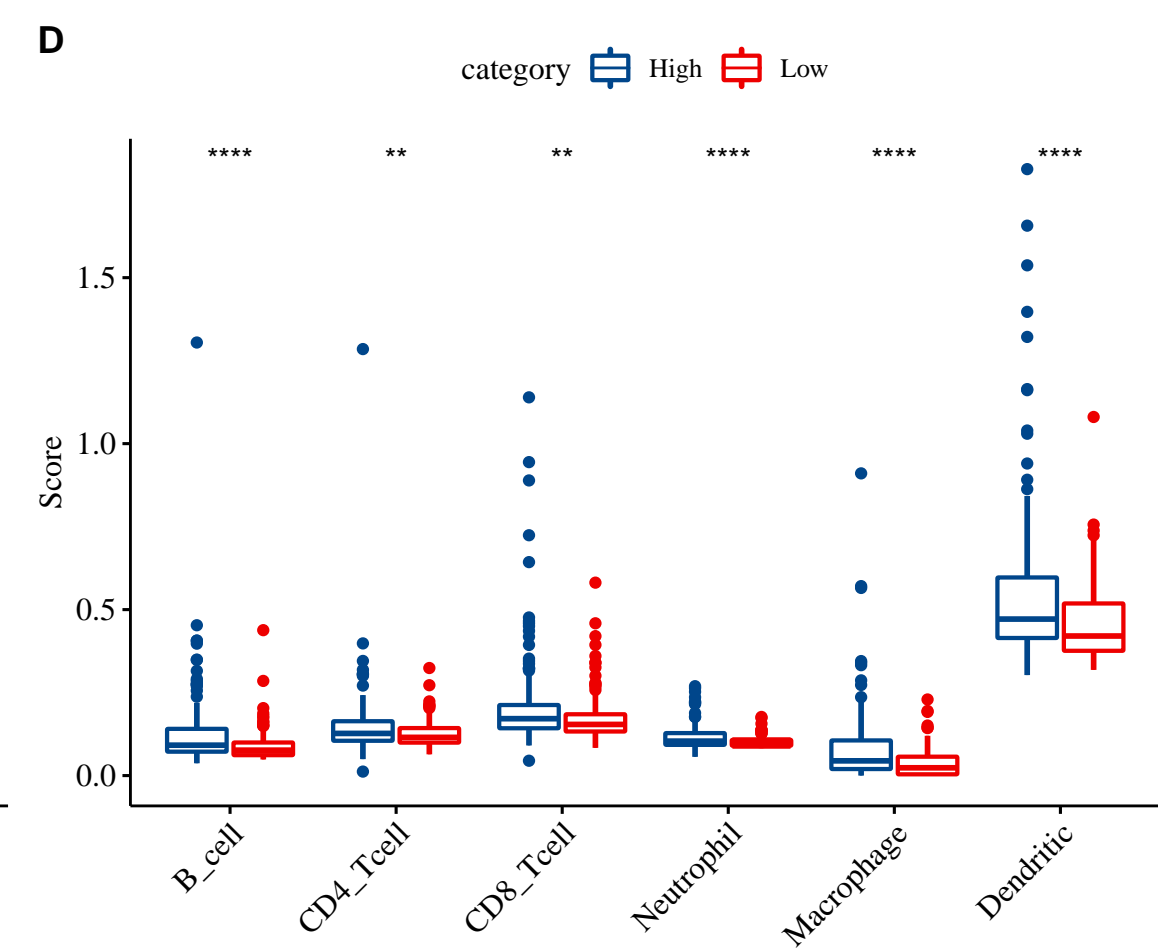

Supplement: f2 [file 2664370.f2.pdf]
